# Supplementary material for: Key genes and co-expression modules involved in asthma pathogenesis
Source: PeerJ. 2020 Feb 3;8:e8456. doi: 10.7717/peerj.8456 (PMC7003696; doi:10.7717/peerj.8456)
Supplement: Supplemental Information 3 [file peerj-08-8456-s003.xlsx]

## Sheet: Sheet1
ID	Modules.colour	Pathway	MS.lscore.bar
0	grey	[1] response to virus	0
1	turquoise	[2] Wnt signaling pathway	0
2	blue	[3] fat cell differentiation	0
3	brown	[4] renal system development	0
4	yellow	[5] heart morphogenesis	0
5	green	[6] regulation of cytoskeleton organization	1.18071
6	red	[7] regulation of hormone secretion	2.28801
7	black	[8] actin filament organization	2.53643
8	pink	[9] response to hypoxia	0
9	magenta	[10] organic hydroxy compound transport	0
10	purple	[11] regulation of angiogenesis	1.34493
11	greenyellow	[12] steroid metabolic process	0
12	tan	[13] negative regulation of immune response	2.08242
13	salmon	[14] antigen processing and presentation of exogenous peptide antigen via MHC class II	1.24387
14	cyan	[15] neutrophil migration	0
15	midnightblue	[16] regulation of blood coagulation	2.22048
16	lightcyan	[17] lipid homeostasis	0
17	grey60	[18] response to vitamin	0
18	lightgreen	[19] cytokine metabolic process	0
19	lightyellow	[20] G-protein coupled receptor signaling pathway, coupled to cyclic nucleotide second messenger	2.24595
20	royalblue	[21] carboxylic acid biosynthetic process	0
21	darkred	[22] epithelial to mesenchymal transition	1.58533
22	darkgreen	[23] lipid homeostasis	1.61306
MS.lscore.bar=-log10(P value)
