# Supplementary material for: Key genes and co-expression modules involved in asthma pathogenesis
Source: PeerJ. 2020 Feb 3;8:e8456. doi: 10.7717/peerj.8456 (PMC7003696; doi:10.7717/peerj.8456)
Supplement: Supplemental Information 4 [file peerj-08-8456-s004.xlsx]

## Sheet: Sheet1
modules	colours	gene
12	tan	CLCA1
12	tan	PRB1
0	grey	AVPR1A
12	tan	PRB2
0	grey	BPIFA1
0	grey	ITLN1
16	lightcyan	HBA2
12	tan	CST1
12	tan	FETUB
16	lightcyan	HBG1
16	lightcyan	HBA1
16	lightcyan	ALAS2
8	pink	PHACTR3
0	grey	HLA-DRB6
16	lightcyan	HBD
0	grey	LEFTY1
0	grey	KIAA1656
2	blue	HP
0	grey	C5orf52
12	tan	CGREF1
12	tan	CCL26
2	blue	HPR
16	lightcyan	PROK2
22	darkgreen	KRT1
9	lightgreen	MAB21L2
0	grey	MMP1
0	grey	PNMT
12	tan	PRR4
16	lightcyan	PPBP
16	lightcyan	DEFA3
16	lightcyan	CLC
0	grey	SLC22A16
21	darkred	CSF3
0	grey	HLA-DQA2
0	grey	SERPINB11
2	blue	MCEMP1
0	grey	SLC28A2
6	red	RPRML
0	grey	SPRR3
2	blue	FABP4
8	pink	IGHG4
0	grey	H19
6	red	SLCO1B3
2	blue	OLR1
2	blue	CAMP
0	grey	GUCY1B2
0	grey	LOC102724951///LOC102724843///LOC102724219///LOC102723360///LOC389831
0	grey	HABP2
1	turquoise	CGB1
0	grey	RYR3
15	midnightblue	TCN1
21	darkred	FOS
22	darkgreen	CPA3
0	grey	HLA-DQA1
2	blue	C8B
6	red	SLC44A5
2	blue	LPL
20	pink	CXCL10
16	lightcyan	S100A12
15	midnightblue	KRT6C
1	turquoise	RPA4
2	blue	CCL18
2	blue	COLEC12
1	turquoise	CABP7
2	blue	APOC1
22	darkgreen	TPSAB1
15	midnightblue	CEACAM5
0	grey	CYP1B1
0	grey	LMO1
0	grey	HMGCS2
2	blue	INHBA
4	blue	CCL3
22	darkgreen	UTS2
16	lightcyan	HBB
4	blue	TNFAIP6
2	blue	RETN
2	blue	MARCO
2	blue	ECSCR
4	blue	AQP9
22	darkgreen	MS4A2
2	blue	PCOLCE2
0	grey	ELP5
22	darkgreen	C1orf186
16	lightcyan	HBQ1
16	lightcyan	APOBEC3A
7	black	B3GAT1
12	tan	CST2
2	blue	RBP4
0	grey	SLC26A4
2	blue	FN1
12	tan	ZMAT4
2	blue	MRC1
12	tan	SERPINB2
0	grey	MUC13
4	blue	CLEC4D
15	midnightblue	CCK
2	blue	CLEC12A
0	grey	ARSE
16	lightcyan	HBM
0	grey	SNORA62///RPSA
22	darkgreen	TPSD1
4	blue	CLEC4E
16	lightcyan	HEMGN
0	grey	VIP
15	midnightblue	PTPRH
19	lightyellow	SYT1
0	grey	SPP1
20	pink	CXCL9
0	grey	KRT24
0	grey	CD200R1
0	grey	GJA4
7	black	BRINP3
2	blue	APOC2
0	grey	TPO
2	blue	AOC3
4	blue	IL1B
0	grey	SAA1
15	midnightblue	KRT6A
16	lightcyan	CXCR2
7	black	NOS2
0	grey	SAA3P
16	lightcyan	CMTM2
8	pink	GNLY
0	grey	SERPINA11
0	grey	SPRR1B
7	black	ACHE
16	lightcyan	S100A8
12	tan	SCGB1D2
0	grey	LY6D
0	grey	SAA4
6	red	DACH1
6	red	WIF1
2	blue	MSR1
7	black	LOC100132287
2	blue	GAPLINC
2	blue	TREM1
6	red	WNK4
19	lightyellow	KCNA4
2	blue	ADGRE1
0	grey	APOD
2	blue	DCSTAMP
0	grey	SIX3-AS1
9	lightgreen	AFDN-AS1
0	grey	LHX6
19	lightyellow	GP2
2	blue	VSIG4
22	darkgreen	IL1RL1
1	turquoise	LOC105376351
16	lightcyan	TRIM58
2	blue	APOE
19	lightyellow	SYT4
19	lightyellow	DDC
19	lightyellow	SCG5
21	darkred	FOSB
4	blue	CD36
0	grey	CFD
19	lightyellow	NELL1
0	grey	PSCA
0	grey	SSUH2
0	grey	TMEM204
7	black	TMEM45A
0	grey	HSD17B13
0	grey	FBLL1
0	grey	HTR1F
7	black	SFTA1P
0	grey	CASC9
2	blue	PPARG
16	lightcyan	IGHA2///IGHA1///IGH
22	darkgreen	P2RY14
1	turquoise	LINC01120
0	grey	STATH
6	red	KCNA1
10	purple	TPRXL
0	grey	ZBTB16
0	grey	PCSK9
2	blue	MME
4	blue	CCL2
0	grey	TRIM63
0	grey	TRIM31
0	grey	ELFN2
21	darkred	EGR1
1	turquoise	NDP
2	blue	CA2
12	tan	SCGB1D1
0	grey	CDH15
4	blue	TLR8
22	darkgreen	SLC18A2
2	blue	LINC01094
0	grey	MLC1
16	lightcyan	GLT1D1
2	blue	MS4A4A
6	red	MTUS2
0	grey	LYPD2
4	blue	CCL4
0	grey	FKBP5
12	tan	TFF1
0	grey	NID2
3	brown	MFAP4
2	blue	ADTRP
7	black	LTF
19	lightyellow	FEZF2
6	red	ATP4B
7	black	MUC5B
0	grey	HLA-DQB1
2	blue	STAC
0	grey	LZTS1
8	pink	KLRC2
4	blue	FCGR3A
0	grey	CXCL14
2	blue	DNASE2B
7	black	C7orf26
16	lightcyan	HBG2
7	black	THEG
0	grey	HCG9
0	grey	DDX43
0	grey	DPYSL4
19	lightyellow	LINC00261
6	red	C6orf201
7	black	ERICH1-AS1
7	black	DPPA5
2	blue	CEACAM8
0	grey	WNT16
6	red	C6
0	grey	MSLN
0	grey	FBP2
0	grey	KLK12
0	grey	PRPH2
0	grey	PRB4
21	darkred	C8orf4
0	grey	PTPN20
12	tan	WFDC1
12	tan	MUC5AC
2	blue	MS4A7
12	tan	POSTN
0	grey	DCN
7	black	LRP2
2	blue	AGRP
4	blue	OSM
0	grey	CCDC73
10	purple	FAM111B
7	black	TOX
0	grey	SERPINC1
2	blue	CRTAM
2	blue	HTRA4
0	grey	2019-03-04
0	grey	SHISA3
6	red	FHOD3
0	grey	RPS4Y2
3	brown	EDIL3
16	lightcyan	IGLJ3
0	grey	ERAP2
2	blue	C1QA
19	lightyellow	NOL4
0	grey	LOC101930105
0	grey	COL8A1
16	lightcyan	IGHV3-30
1	turquoise	LOC100422737
0	grey	RPE65
2	blue	FCGR1B
19	lightyellow	SCGN
0	grey	SVOP
1	turquoise	LIN28A
12	tan	FRMD1
4	blue	FPR2
1	turquoise	CD86
16	lightcyan	IGKC
7	black	PRLHR
0	grey	FATE1
4	blue	LILRA2
3	brown	SPARCL1
0	grey	FCGBP
0	grey	EDN2
1	turquoise	NYAP1
0	grey	OOEP
1	turquoise	RBMY1E
0	grey	UTY
12	tan	SERPINB10
8	pink	XCL1
4	blue	FCGR3B
9	lightgreen	SAMD10
0	grey	CCL20
20	pink	IDO1
7	black	TMEM74B
7	black	C3
12	tan	MUM1L1
0	grey	PLAT
0	grey	MMP12
0	grey	DMBT1
2	blue	CATSPER1
4	blue	TNIP3
0	grey	PRKCB
0	grey	UGT1A8
10	purple	PDE10A
2	blue	TYROBP
0	grey	ADGRL3
0	grey	NTS
3	brown	FZD10
1	turquoise	VPS18
17	grey60	HSP90AB6P
6	red	SEC14L3
16	lightcyan	NFE2
19	lightyellow	OR51E1
0	grey	CLSTN2
20	pink	KLHDC7B
0	grey	LOC100240735
0	grey	FLT3
1	turquoise	FAM166B
4	blue	LILRB2
0	grey	ADORA3
22	darkgreen	ZBTB32
0	grey	TAS2R20
3	brown	CD34
10	purple	TCAM1P
12	tan	LRRC31
22	darkgreen	PTGS1
2	blue	C1QB
4	blue	CTSW
0	grey	HSD17B6
7	black	TGM7
0	grey	S100B
0	grey	WISP2
4	blue	MNDA
0	grey	DPYS
1	turquoise	LINC00880
0	grey	MYH11
0	grey	CAPN14
4	blue	FPR1
0	grey	CES1P1
4	blue	PLEK
21	darkred	EGR2
6	red	NAV3
0	grey	COX7A1
4	blue	IL4I1
0	grey	KRT40
9	lightgreen	IL27
1	turquoise	LOC100286906
15	midnightblue	SCEL
7	black	MGP
0	grey	CD1E
2	blue	HK3
12	tan	AADAC
16	lightcyan	IGLL5///CYAT1///IGLV3-21
6	red	C15orf48
7	black	ADARB2-AS1
0	grey	CD1A
8	pink	KLRK1
8	pink	ZNF683
15	midnightblue	B3GNT6
0	grey	C11orf96
2	blue	CD163
0	grey	KIF25
0	grey	FLJ36840
16	lightcyan	S100A9
0	grey	SPON1
0	grey	DKK1
15	midnightblue	SNTG2
0	grey	LINC01206
0	grey	KEL
0	grey	BTNL8
0	grey	SLC9A3
0	grey	OXTR
6	red	THSD7A
2	blue	CD52
8	pink	TRAT1
2	blue	CD33
0	grey	DNASE1L3
4	blue	LILRB1
22	darkgreen	CD1C
0	grey	SERPINA3
6	red	LRRC63
6	red	ANGPTL4
2	blue	SLCO2B1
10	purple	ABCA12
0	grey	C4BPA
6	red	GAD1
0	grey	WBSCR27
1	turquoise	SEMA7A
1	turquoise	DCAF4L2
9	lightgreen	PRSS36
0	grey	LOC100505984
0	grey	ZNF667-AS1
0	grey	LINC00689
18	lightgreen	ZFP57
0	grey	ZFHX4
19	lightyellow	BEX1
2	blue	FPR3
6	red	HSD17B2
10	purple	TNNC2
0	grey	SLITRK5
1	turquoise	KIF26A
0	grey	ZNF503-AS1
2	blue	TIMD4
8	pink	GZMH
0	grey	HLA-DQB2
17	grey60	KRTAP12-2
2	blue	SPOCD1
0	grey	LINC00854
7	black	SCGB3A1
0	grey	LKAAEAR1
1	turquoise	P2RX6
0	grey	SIGLEC12
0	grey	ASPG
0	grey	ABLIM3
12	tan	TNFSF11
0	grey	DDX4
7	black	GPR156
0	grey	KCNE4
19	lightyellow	GRP
15	midnightblue	SLC5A8
0	grey	NLGN4Y
2	blue	TREM2
7	black	RPRM
0	grey	B3GALT5-AS1
17	grey60	IL1RAPL2
22	darkgreen	CEACAM21
16	lightcyan	TESC
12	tan	PGLYRP4
3	brown	MMP10
5	green	NEXN-AS1
16	lightcyan	CXCR2P1
15	midnightblue	FGFBP1
0	grey	UBD
19	lightyellow	SUCNR1
21	darkred	EGR3
8	pink	GZMK
0	grey	SFRP1
0	grey	TMSB4Y
7	black	TWIST2
2	blue	CCL23
0	grey	ZNF295-AS1
2	blue	SPARC
7	black	SPATA3
4	blue	SAMSN1
19	lightyellow	HOXB5
16	lightcyan	CXCR1
0	grey	MMP13
0	grey	GSTT2
0	grey	LOC403323
2	blue	CHI3L2
0	grey	PAX8-AS1
0	grey	AKR1B10
0	grey	SERPINB7
15	midnightblue	ZG16
0	grey	LDHC
0	grey	CHP2
12	tan	CPNE4
0	grey	XIST
19	lightyellow	SV2B
8	pink	XCL2
19	lightyellow	SCG2
2	blue	NLRC4
0	grey	PMCH
19	lightyellow	NPTX1
21	darkred	PTGS2
0	grey	SYCE1
7	black	CRABP2
0	grey	F2R
0	grey	CPB1
2	blue	OASL
1	turquoise	TULP2
17	grey60	BIRC8
0	grey	PDE6A
22	darkgreen	HPGDS
2	blue	HSD11B1
0	grey	BTNL3
6	red	ODF1
22	darkgreen	CTSG
0	grey	SPINK5
7	black	AARD
6	red	PCDH17
0	grey	LOC100506699
2	blue	MOGAT1
19	lightyellow	TUBB2B
0	grey	DES
2	blue	GNGT2
17	grey60	TPT1P8
1	turquoise	GNG3
15	midnightblue	KRT6B
7	black	CHL1-AS1
15	midnightblue	CTHRC1
0	grey	CRISP2
3	brown	TSLP
12	tan	C1orf64
16	lightcyan	JCHAIN
0	grey	BLK
0	grey	SLC5A11
17	grey60	HIST1H3J
1	turquoise	PPP1R14A
0	grey	CCDC68
0	grey	ZSCAN4
0	grey	TFAP2B
0	grey	DSG3
19	lightyellow	CDH18
2	blue	CD68
6	red	CORO2B
2	blue	SLC6A12
0	grey	F5
12	tan	GUCA2B
0	grey	PPP1R1A
8	pink	LOC102724760///IGHV1OR15-1
1	turquoise	MIXL1
18	lightgreen	ZNF205
15	midnightblue	UPK1B
21	darkred	DUSP5
2	blue	SIGLEC1
8	pink	GZMA
0	grey	SPESP1
8	pink	LINC00892
0	grey	TBX2
0	grey	ECM1
0	grey	MDGA1
1	turquoise	GDAP1L1
2	blue	MS4A14
0	grey	CCDC144B
1	turquoise	OR5P2
16	lightcyan	PF4
0	grey	LOC100128164
22	darkgreen	CALB2
8	pink	KIR2DS2
0	grey	PTN
10	purple	ANLN
0	grey	M1AP
0	grey	LOC389831
7	black	LAG3
10	purple	SHCBP1
6	red	CWH43
10	purple	NMU
0	grey	SPOCK3
0	grey	S1PR1
0	grey	RPS4Y1
12	tan	LOC401127
0	grey	IL1R2
8	pink	GATA3
8	pink	KLRD1
16	lightcyan	GNG11
0	grey	POMC
4	blue	CD101
2	blue	PKD2L1
15	midnightblue	DEFB1
2	blue	PLAUR
12	tan	ADRA2A
15	midnightblue	CALML5
16	lightcyan	HSPC102
3	brown	IGFBP6
2	blue	RGS1
0	grey	LINC00202-2
2	blue	CD5L
1	turquoise	MGC39584
4	blue	CEACAM4
0	grey	CCEPR
19	lightyellow	NR0B1
4	blue	CD69
4	blue	FGR
1	turquoise	CNKSR2
2	blue	SNX10
0	grey	RASGRP3
1	turquoise	PAX6
2	blue	KCNA3
20	pink	IFI44L
0	grey	DDX3Y
12	tan	FMOD
0	grey	ASCL3
0	grey	CDR1
6	red	MIA
0	grey	MMP7
16	lightcyan	FCN1
4	blue	ADGRE3
7	black	CCDC169
4	blue	LILRB3
3	brown	ITM2A
2	blue	ALOX5AP
6	red	HNF1A-AS1
1	turquoise	MIP
0	grey	ALDH3A1
0	grey	OTP
0	grey	TFCP2L1
10	purple	SLC6A13
0	grey	SPRR1A
0	grey	UGT2B7
0	grey	NEU4
2	blue	C1orf162
0	grey	C6orf58
1	turquoise	RASL10B
8	pink	LGALS2
6	red	SYT13
1	turquoise	APOL5
19	lightyellow	UCHL1
0	grey	NLRP2B
0	grey	XAGE2
3	brown	TMPRSS11D
0	grey	LINC00264
9	lightgreen	CRCT1
0	grey	TRH
0	grey	PIP
0	grey	TEKT4P2
8	pink	JAKMIP1
0	grey	IL36G
0	grey	FAM198B
4	blue	SIGLEC11
0	grey	POM121L9P
0	grey	SULT1C2
4	blue	IGSF6
20	pink	CXCL11
3	brown	CDH13
0	grey	GPER1
0	grey	ITGA10
15	midnightblue	GLYATL2
18	lightgreen	NPBWR1
6	red	ATOH8
10	purple	CCNA1
7	black	PNMA2
8	pink	CD70
10	purple	OCA2
0	grey	KDM5D
0	grey	CX3CR1
0	grey	ADH4
0	grey	PDLIM3
0	grey	TNFRSF17
0	grey	FCER1A
0	grey	SAA2
0	grey	KBTBD11
1	turquoise	VRTN
0	grey	SKINT1L
0	grey	UGT2B17
1	turquoise	FKBP6
0	grey	GFPT2
1	turquoise	AVPR1B
0	grey	LOC100131289
0	grey	SFRP2
10	purple	CDC20B
0	grey	SSPO
9	lightgreen	LOC105373876
0	grey	CYP4F11
1	turquoise	NOX5
0	grey	CLDN22
0	grey	C1QL2
18	lightgreen	NEUROG1
6	red	TMEM200A
8	pink	LTB
0	grey	ELMOD1
0	grey	LINC01296
0	grey	LOC400043
2	blue	OR52K3P
0	grey	EPHB1
8	pink	CCL5
12	tan	MZB1
2	blue	GPRIN3
4	blue	LY96
20	pink	DRD1
0	grey	AGMO
2	blue	L1TD1
7	black	CXCL6
3	brown	ST6GAL2
0	grey	TPTE2P6
0	grey	ACSM1
12	tan	TNFRSF11B
4	blue	PLA2G7
0	grey	GRB14
2	blue	FLVCR2
4	blue	SLC2A3
6	red	DNAJC5B
2	blue	ACP5
0	grey	KNCN
20	pink	BST2
2	blue	2019-09-04
0	grey	LOC105369230///HLA-DRB5///HLA-DRB4///HLA-DRB3///HLA-DRB1
8	pink	KLRC4
0	grey	A1BG-AS1
16	lightcyan	ADM
8	pink	CXCR6
0	grey	GSTT1
0	grey	LEMD1
6	red	SAMD3
4	blue	CCL3L3
0	grey	LOC105372881
0	grey	SLC25A41
4	blue	GPR65
15	midnightblue	CHI3L1
3	brown	JAM3
21	darkred	RASD1
1	turquoise	FLRT1
4	blue	LAPTM5
0	grey	MSMB
0	grey	ABO
0	grey	TDRD9
0	grey	PCAT4
7	black	PEG10
0	grey	NLRP2
15	midnightblue	FGFBP2
16	lightcyan	MYL4
8	pink	KLRB1
0	grey	C4B
0	grey	C3orf30
2	blue	GTSF1
7	black	RAMP2
12	tan	ANO7
0	grey	FLVCR1-AS1
0	grey	CHIT1
0	grey	SLC26A8
2	blue	BTK
0	grey	ATP8B3
7	black	SGCE
2	blue	CYBB
1	turquoise	OR2B6
8	pink	CST7
2	blue	LAIR1
0	grey	DLGAP1-AS4
16	lightcyan	CSF3R
1	turquoise	EGFR-AS1
4	blue	NCF4
0	grey	LOC101060157
0	grey	MN1
5	green	FLJ33360
0	grey	C14orf178
1	turquoise	DAND5
0	grey	ANXA13
1	turquoise	FSHR
10	purple	CKM
3	brown	PCDHB10
0	grey	SCN1B
0	grey	FAM167A-AS1
0	grey	POU4F2
6	red	PXDN
0	grey	IGHV3-48///IGHV3-69-1
3	brown	TSPAN7
2	blue	CD83
0	grey	CA10
4	blue	CD37
6	red	PRUNE2
0	grey	KDR
3	brown	KRT13
0	grey	CDH2
6	red	PPP5D1
0	grey	GATA1
0	grey	LOC100507103
0	grey	MYLK3
0	grey	ARMC12
8	pink	KLRC3
0	grey	TMEM130
0	grey	GLI1
0	grey	SERPINB9P1
0	grey	ATP6V1G3
12	tan	FAM20A
3	brown	SULT1E1
6	red	NPR3
0	grey	KLHDC8A
3	brown	PCDHB15
17	grey60	OR51G1
4	blue	TNNI2
0	grey	WFDC9
0	grey	NNMT
7	black	NODAL
3	brown	DIRAS3
0	grey	LRRC4C
0	grey	CCL13
0	grey	FOXD1
3	brown	CAMK2B
22	darkgreen	DDIT4L
8	pink	GZMB
10	purple	AURKB
2	blue	SLC11A1
8	pink	ZNF831
2	blue	PECAM1
0	grey	ECHDC3
2	blue	ALOX5
7	black	CCL15
11	greenyellow	SPANXA2-OT1
0	grey	CCR6
2	blue	RTN1
0	grey	LHFPL1
0	grey	ADAMTS15
9	lightgreen	DIRC1
2	blue	FAM89A
6	red	SLC16A12
8	pink	KCNJ15
0	grey	GABRB3
0	grey	DPPA3
0	grey	HOXD13
9	lightgreen	ZNF157
0	grey	KL
3	brown	SOD3
10	purple	PLEKHG4B
4	blue	SRGN
0	grey	AGBL1
0	grey	EDA2R
0	grey	HTR1A
0	grey	CRYBB2P1
19	lightyellow	CHGB
1	turquoise	NPSA
0	grey	NR2F1
6	red	CREB5
19	lightyellow	FAM155A
3	brown	FST
0	grey	LOC100652999
1	turquoise	RALYL
0	grey	PTGES
0	grey	FDCSP
1	turquoise	TDRD1
0	grey	HTR3C
3	brown	IL20RB
9	lightgreen	KRTAP5-8
16	lightcyan	IGHM
0	grey	CLSPN
2	blue	SLAMF8
7	black	ALOXE3
0	grey	LGSN
0	grey	C2CD4C
9	lightgreen	OR7A17
1	turquoise	NDST4
5	green	LINC00342
16	lightcyan	AHSP
3	brown	MPPED1
2	blue	BEST1
0	grey	LOC100506236
0	grey	ADAMTS5
0	grey	TMEM176B
0	grey	LOC375196
1	turquoise	INSL6
19	lightyellow	NEB
3	brown	KHDRBS2
0	grey	LGI4
10	purple	LINC00633
2	blue	CCRL2
0	grey	SLC39A12
0	grey	HOXA6
2	blue	COL8A2
0	grey	EPHA5-AS1
0	grey	G0S2
4	blue	EVI2B
9	lightgreen	C5orf58
1	turquoise	KCTD8
1	turquoise	ACTN2
10	purple	ASPM
7	black	NAT8B
0	grey	TXLNGY
7	black	CYP24A1
0	grey	IL12RB2
0	grey	FAM209B
0	grey	RARRES1
16	lightcyan	CA1
4	blue	CCR1
0	grey	MGC57346
0	grey	PEBP4
0	grey	ATP13A5
0	grey	SLC1A2
0	grey	AJAP1
3	brown	HPGD
0	grey	ACTG2
1	turquoise	AKAP12
0	grey	ANKDD1A
4	blue	MPP1
11	greenyellow	CRP
0	grey	NT5C1A
10	purple	CDC25C
15	midnightblue	HSPB8
1	turquoise	KRTAP13-1
0	grey	LOC100507460
0	grey	PRKG1
0	grey	KRT4
0	grey	USP32P1
1	turquoise	ATXN3L
0	grey	DKFZP434K028
0	grey	CLEC18A
1	turquoise	AADACL2
18	lightgreen	FGF11
12	tan	DHX35
9	lightgreen	KRBOX1
4	blue	TNFRSF1B
1	turquoise	LINC00670
10	purple	ESCO2
17	grey60	KRTAP1-5
0	grey	NECAB2
6	red	CD109
0	grey	BLID
1	turquoise	IL26
1	turquoise	PKDREJ
0	grey	GREB1L
0	grey	MIR924HG
0	grey	GSTM5
3	brown	HCG23
0	grey	LOC105376714///SLC30A4
0	grey	LOC642620
0	grey	CD177
0	grey	TSPAN11
0	grey	CKLF-CMTM1
0	grey	HGD
1	turquoise	PTPRR
0	grey	GBA3
0	grey	KY
15	midnightblue	PRSS50
11	greenyellow	KCNQ4
13	green	LINC01410
0	grey	DSCAM-AS1
4	blue	LILRB5
0	grey	BMP5
1	turquoise	NLGN4X
12	tan	CHAD
6	red	MSRB3
0	grey	SPP2
2	blue	ABCG2
0	grey	CYGB
1	turquoise	FAM106CP
3	brown	KRT16P3
1	turquoise	IFNA6
0	grey	CD160
2	blue	CD300LF
0	grey	DAPK1
6	red	NDNF
0	grey	ERV9-1
1	turquoise	KLHL34
0	grey	SPRR2D
4	blue	LRRC25
10	purple	MKI67
0	grey	MKRN3
15	midnightblue	DNAJC12
20	pink	HLA-DRB5
0	grey	MAMDC2
0	grey	FSIP2
0	grey	TMEM178B
0	grey	CDH5
12	tan	DOK1
1	turquoise	ACTL8
6	red	SCN4B
4	blue	LST1
4	blue	SPI1
0	grey	GNMT
0	grey	DOC2B
8	pink	RGL4
17	grey60	GPR63
0	grey	MIR100HG
0	grey	LGALS7
8	pink	GIMAP4
3	brown	SNX31
0	grey	STK31
1	turquoise	FMO9P
2	blue	C1QC
0	grey	GRAPL
0	grey	ANO5
19	lightyellow	ASCL1
0	grey	C8A
19	lightyellow	KIF5C
0	grey	STARD13-AS
6	red	SIAH3
0	grey	CST6
3	brown	KIF7
0	grey	PLK5
16	lightcyan	SSTR5-AS1
2	blue	IFI30
0	grey	TMEM266
0	grey	STAP1
0	grey	CABYR
0	grey	UGT3A2
0	grey	C17orf98
8	pink	IL32
8	pink	PTPN22
0	grey	USP44
0	grey	JSRP1
0	grey	KRT222
0	grey	TTTY2
6	red	SLC47A2
2	blue	FCER1G
0	grey	ADAMDEC1
0	grey	LMO7DN
0	grey	GPRC6A
22	darkgreen	GATA2
2	blue	TNNT1
2	blue	SERPINA1
20	pink	IDO2
2	blue	EREG
0	grey	SLC16A14
15	midnightblue	CATSPERB
0	grey	CSPG4
17	grey60	IGF2
4	blue	SIGLEC7
0	grey	SPATA31C2
0	grey	CA12
1	turquoise	FNDC4
7	black	SHISA2
8	pink	MPEG1
0	grey	FAM83C
0	grey	STARD13
0	grey	FAM19A5
6	red	SLIT2
3	brown	CCDC3
0	grey	TAGLN3
0	grey	EGR4
6	red	CNTD1
0	grey	LOC100506253
1	turquoise	CPNE9
21	darkred	CXCL3
0	grey	SLCO2A1
13	green	CPE
1	turquoise	PNLIP
0	grey	SLC6A1
0	grey	SERPINA6
0	grey	MYOM2
13	green	LOC157860
0	grey	WTAPP1
1	turquoise	CCDC144NL
0	grey	SLC46A2
13	green	POM121L8P
15	midnightblue	SHC2
13	green	POTEB3
11	greenyellow	TMEM47
16	lightcyan	EPB42
10	purple	FXYD1
5	green	PP12708
0	grey	CRNN
0	grey	KCNJ5
16	lightcyan	RNASE2
2	blue	SLC19A3
7	black	PTGIR
4	blue	SLC2A14
0	grey	C1QTNF9
1	turquoise	NAT8
0	grey	ZBTB46-AS1
1	turquoise	KCNIP1
0	grey	SYT8
0	grey	ONECUT1
6	red	IGF2BP3
1	turquoise	FLNC
0	grey	ZDHHC8P1
17	grey60	XRCC6P5
4	blue	GMFG
0	grey	CXCL8
19	lightyellow	CALCA
4	blue	ITGB2
0	grey	CLECL1
0	grey	RHOXF1
0	grey	FTCDNL1
0	grey	KRTAP3-2
4	blue	NCKAP1L
1	turquoise	FAM106A
0	grey	LOC284241
4	blue	SERPING1
0	grey	SPINK1
1	turquoise	C20orf166-AS1
11	greenyellow	LOC102724250
1	turquoise	IL22RA2
5	green	LOC100240734
2	blue	LGALS1
3	brown	CYP26A1
0	grey	ALX1
5	green	SYNGAP1
21	darkred	IL6
3	brown	GAS1
0	grey	CETN1
6	red	IL18R1
0	grey	SLC17A3
0	grey	FKBP10
7	black	ERP27
0	grey	SYNE3
0	grey	STON1
1	turquoise	TMEM100
2	blue	TLR7
7	black	CLCA2
1	turquoise	HOXA1
0	grey	C4orf26
10	purple	KIF14
1	turquoise	HTR1D
1	turquoise	TBC1D27
2	blue	GPA33
1	turquoise	IL2RA
0	grey	XIRP1
0	grey	CCDC144A
8	pink	TOX2
3	brown	PCDHB16
0	grey	FAM228A
5	green	FAM153B
0	grey	KLF9
20	pink	HLA-DRB3
0	grey	KCNT1
1	turquoise	MAGEA5
2	blue	GPR34
8	pink	CXorf65
0	grey	BSND
8	pink	KLRC1
0	grey	SRPX
1	turquoise	FMR1NB
15	midnightblue	GRK5
2	blue	LYZ
8	pink	RGS9
0	grey	PLG
12	tan	PDGFRL
7	black	RGN
0	grey	CXCL13
20	pink	IFI27
0	grey	TIMP4
1	turquoise	VN1R1
0	grey	ZNF300P1
0	grey	RNF150
0	grey	ZEB1
0	grey	CD207
5	green	EGFEM1P
0	grey	GGT8P
0	grey	CIART
0	grey	PALM3
5	green	LOC57399
0	grey	HOTAIRM1
0	grey	LOC101927770
11	greenyellow	LOC284072
12	tan	LINC00839
0	grey	RBP1
10	purple	CDC6
0	grey	GPR137C
2	blue	SCIMP
10	purple	CKAP2L
8	pink	NMUR1
4	blue	CLEC7A
0	grey	HYAL4
0	grey	CLCA4
12	tan	LOC220077
15	midnightblue	SRPX2
0	grey	BARHL2
1	turquoise	LINC00309
5	green	CYP2B7P
4	blue	KIAA0226L
0	grey	TMSB15A
0	grey	SULT2B1
9	lightgreen	AMN
8	pink	PRF1
0	grey	TSC22D3
1	turquoise	PTH1R
0	grey	SMIM6
0	grey	AMPD1
0	grey	MRGPRX1
21	darkred	CYR61
16	lightcyan	SH2D1B
0	grey	PIK3C2G
4	blue	HLA-DPA1
4	blue	NCF1
0	grey	DPF2
3	brown	CKMT2
8	pink	P2RY8
4	blue	HLA-DPB1
0	grey	ADGRF2
0	grey	ADAM32
16	lightcyan	IL18RAP
5	green	ADAM20
1	turquoise	HOXA4
3	brown	KCNF1
13	green	TYMP
0	grey	CDIPT-AS1
0	grey	ST3GAL6-AS1
0	grey	SH3TC2
0	grey	TMC7
3	brown	COL12A1
4	blue	CD84
10	purple	RUNDC3B
2	blue	IL1A
0	grey	CACNG1
8	pink	TRBV5-4
0	grey	LUNAR1
0	grey	VLDLR-AS1
0	grey	PRR18
0	grey	COL1A2
10	purple	PBK
8	pink	SIRPG
8	pink	GPR18
7	black	CSH1
0	grey	OGDHL
0	grey	NRG3
0	grey	SSTR5
0	grey	C9orf84
20	pink	HLA-K
7	black	LMO3
20	pink	AIM2
0	grey	CRTAC1
1	turquoise	OR8D1
0	grey	KBTBD12
11	greenyellow	PYY2
8	pink	GIMAP5
14	cyan	CLPTM1
0	grey	TTTY15
0	grey	HTRA3
17	grey60	PNMAL1
0	grey	MAGEA8
0	grey	TFPI2
6	red	SOX9-AS1
0	grey	LRRC19
1	turquoise	CLEC4F
0	grey	CA4
10	purple	HIST1H1B
8	pink	ITK
0	grey	LINC00491
11	greenyellow	MRGPRX4
12	tan	NPW
6	red	AGPAT4-IT1
0	grey	ASB2
0	grey	POM121L12
5	green	OCR1
10	purple	CENPA
0	grey	SPINK4
0	grey	FANCD2OS
10	purple	FOXN4
12	tan	PYCR1
3	brown	KRT5
0	grey	FAM78B
0	grey	DUX3
10	purple	DLGAP1
4	blue	LOC283454
2	blue	PLIN2
8	pink	NKG7
0	grey	DPP4
0	grey	BEX5
3	brown	FLRT3
0	grey	CCR4
0	grey	DCLK2
10	purple	SAG
19	lightyellow	SLC26A9
0	grey	MAPK12
0	grey	BMX
6	red	ABI3BP
0	grey	LOC100996385
0	grey	ADH7
0	grey	OR10H3
0	grey	IL23R
9	lightgreen	LINC01405
0	grey	OSR2
0	grey	LOC645321
0	grey	SHISA6
0	grey	LOC100287166
2	blue	IL3RA
0	grey	KLHL10
0	grey	C6orf15
6	red	SEMA3E
6	red	STEAP4
0	grey	PLEKHH1
0	grey	CRYBA1
7	black	EBF2
1	turquoise	ZCCHC13
10	purple	TMEM200B
0	grey	CASP12
0	grey	LINC01279
8	pink	UBASH3A
1	turquoise	ADAMTS8
4	blue	ITGAX
0	grey	NMRAL1P1
0	grey	DGKG
0	grey	OR8D2
1	turquoise	BMP15
0	grey	AMHR2
2	blue	IRF8
0	grey	LOC100130741
4	blue	HCST
0	grey	MIR155HG
0	grey	ADAMTS19
7	black	HCRT
18	lightgreen	FOXB1
0	grey	XKR3
1	turquoise	SLC3A1
0	grey	TMEM59L
7	black	SUSD2
4	blue	CD53
3	brown	SCN2B
0	grey	KCNK17
0	grey	GINS1
0	grey	LGALS7B
17	grey60	ADAM21
0	grey	BAAT
12	tan	BMP8A
7	black	EPHA10
0	grey	HCAR3
2	blue	TFEC
15	midnightblue	DPYSL3
0	grey	C19orf71
0	grey	CDH16
12	tan	FAM83D
14	cyan	CEACAM3
2	blue	FGD5
21	darkred	CXCL2
0	grey	SLC27A6
0	grey	FAM107A
1	turquoise	PRO2964
0	grey	SPTSSB
20	pink	HLA-L
5	green	FLJ42393
12	tan	TTPA
19	lightyellow	CAMK2N1
0	grey	RDH12
15	midnightblue	FXYD6
2	blue	FBP1
18	lightgreen	AVP
12	tan	KDELR3
15	midnightblue	SEZ6L2
0	grey	LRRTM1
0	grey	GBX2
0	grey	KIR2DL5A
0	grey	TRIM49
0	grey	ANKRD19P
0	grey	CLEC4G
2	blue	CPM
8	pink	TARP
0	grey	FBN1
0	grey	PCDHGB3
0	grey	RNF182
8	pink	CD48
1	turquoise	IQCF4
8	pink	TBC1D10C
0	grey	FADS1
8	pink	CD8A
0	grey	AGT
0	grey	PRB3
0	grey	RGPD1
20	pink	HCG26
1	turquoise	LOC105373942
0	grey	C16orf92
0	grey	TMEM52B
0	grey	SOST
0	grey	DNAJB8
7	black	C12orf54
0	grey	LAIR2
0	grey	FAM197Y2P
6	red	KCNN3
0	grey	LOC643355
13	green	POTED
0	grey	CNTNAP3B
8	pink	CD2
6	red	PPP4R4
1	turquoise	RNF112
1	turquoise	GLB1L3
0	grey	CACNG5
1	turquoise	NBPF22P
0	grey	TMEM213
2	blue	CSF1R
2	blue	GAS2L3
0	grey	CYP4Z2P
0	grey	ADORA1
0	grey	LIN7A
6	red	CILP
4	blue	LILRA5
7	black	SAMD14
0	grey	ADAMTS1
8	pink	GPR171
0	grey	GRM8
2	blue	GGTA1P
0	grey	SLC5A7
2	blue	NEFH
0	grey	PWAR5
0	grey	PADI1
0	grey	PRSS30P
0	grey	RHCE
1	turquoise	PLCE1-AS2
0	grey	CD1B
11	greenyellow	S100A5
0	grey	LINC01127
17	grey60	HIST1H4G
0	grey	C5orf66-AS2
0	grey	CYP3A4
5	green	ABCA9
2	blue	ATP6V0D2
0	grey	EGF
3	brown	GLT8D2
0	grey	UPK3A
1	turquoise	GRIN3B
0	grey	NALCN
0	grey	GABRD
13	green	NEAT1
0	grey	TSKS
12	tan	TFF2
7	black	PRKAR2B
8	pink	CD247
15	midnightblue	LRRC4B
6	red	PROS1
2	blue	APOC4
17	grey60	CTAGE10P
8	pink	2019-09-01
2	blue	PARVB
0	grey	HSD11B2
10	purple	TOP2A
0	grey	ROR1
0	grey	LRRTM2
0	grey	ENPP1
10	purple	MEP1A
7	black	CYP2A13
1	turquoise	AQP12B
1	turquoise	LOC105377134
0	grey	MYO18B
22	darkgreen	C10orf128
0	grey	CSPG4P1Y
4	blue	LCP1
7	black	SLAMF7
2	blue	MILR1
0	grey	ZNF252P-AS1
14	cyan	GSTM2P1
1	turquoise	LOC100421494
1	turquoise	AGTR2
1	turquoise	STARD8
4	blue	PMP22
0	grey	TPTE
14	cyan	IL2RG
8	pink	GIMAP6
0	grey	CT45A5
1	turquoise	DUSP27
0	grey	SLIT2-IT1
1	turquoise	SLC10A4
0	grey	DPP10-AS1
4	blue	RGS18
5	green	STAG3L1
13	green	C8orf46
0	grey	C17orf78
20	pink	EPSTI1
7	black	FOLR3
10	purple	SPC25
0	grey	TMPRSS11B
20	pink	HLA-DRB4
0	grey	LINC00319
7	black	FOLR1
4	blue	PDE3B
7	black	TCF23
0	grey	MCHR2-AS1
0	grey	EOMES
0	grey	C8orf48
11	greenyellow	PCDHGC4
8	pink	CXCR3
0	grey	LOC389834
0	grey	LOC100506725
1	turquoise	ANKRD52
5	green	ZDHHC11
14	cyan	CEACAM6
0	grey	CLCNKA
0	grey	LINC00643
0	grey	MYRIP
16	lightcyan	PGLYRP1
0	grey	C4orf45
0	grey	IL17RB
16	lightcyan	CLCA3P
0	grey	PTPRD
4	blue	FCGR2A
0	grey	TM4SF19
0	grey	OR2M2
0	grey	RGS4
7	black	SCGB1A1
0	grey	CSGALNACT1
16	lightcyan	NRGN
0	grey	SPRR2C
0	grey	C4BPB
0	grey	SLA2
12	tan	MAGED4B
15	midnightblue	NKAIN2
8	pink	JAML
0	grey	TRAF3IP2-AS1
0	grey	MTMR10
0	grey	PSPH
0	grey	NKX6-2
0	grey	TRPC7
8	pink	GPR174
0	grey	KRTAP4-2
0	grey	IP6K3
5	green	RBP2
0	grey	CD79B
12	tan	KAZALD1
0	grey	VMO1
11	greenyellow	DCD
19	lightyellow	PCSK1
0	grey	LOC285389
1	turquoise	FOXL2
6	red	SLC51A
14	cyan	MARCKSL1
3	brown	UBE2QL1
8	pink	GIMAP7
0	grey	VGLL1
12	tan	NEK6
0	grey	P4HA3
7	black	ATP8A2
0	grey	OR13C4
13	green	TNNI3
12	tan	ADCY4
16	lightcyan	TNFRSF10C
0	grey	PLEKHN1
0	grey	KIR2DS1
15	midnightblue	LINC00675
0	grey	LOC200726
0	grey	ZBTB20-AS1
1	turquoise	TNFRSF10D
13	green	FAR2P1
18	lightgreen	CELA2B
0	grey	APOBEC2
0	grey	TMEM229B
0	grey	PLXNB3
0	grey	FGF20
1	turquoise	LRIT1
11	greenyellow	OR1L3
0	grey	LOC100130920
7	black	MALL
0	grey	RORA-AS1
13	green	POTEG
22	darkgreen	GAPT
14	cyan	GPRIN1
0	grey	CNNM1
5	green	LINC01506
0	grey	NOSTRIN
0	grey	FHL1
0	grey	SOSTDC1
0	grey	APOBEC3H
0	grey	LOC100130916
4	blue	PIK3AP1
0	grey	TNAP
0	grey	LINC00202-1
0	grey	CCDC116
2	blue	LY86
0	grey	LY6K
0	grey	KCNK16
0	grey	SLC2A6
0	grey	FKSG29
0	grey	C17orf77
1	turquoise	PRODH2
0	grey	ODF3L1
19	lightyellow	PROX1
0	grey	TSPAN15
0	grey	PCDHGB7
3	brown	IFITM10
0	grey	BPI
1	turquoise	AGAP2-AS1
10	purple	HIST1H1A
0	grey	KAAG1
1	turquoise	SERPINE2
8	pink	FYB
1	turquoise	C11orf40
0	grey	LOC100134317///LOC284412
0	grey	LUM
0	grey	IL36B
0	grey	PHEX
3	brown	KLRG2
0	grey	GCNT4
6	red	GJB7
0	grey	CNGA3
6	red	TRIM17
0	grey	FAM74A1
2	blue	THEMIS2
21	darkred	DUSP2
6	red	CLDN8
0	grey	JAKMIP3
0	grey	TTTY14
0	grey	PPP1R1B
0	grey	BSN-AS2
0	grey	NKAPL
0	grey	CXCL12
2	blue	HAVCR2
0	grey	CNTN1
0	grey	ESX1
18	lightgreen	PRSS56
1	turquoise	KANSL1-AS1
0	grey	NGB
9	lightgreen	ANK2
0	grey	C1orf100
0	grey	LOC440934
11	greenyellow	ECEL1
0	grey	ZNF718
0	grey	MSX2P1
0	grey	LOC101060524///DRD5P2
0	grey	COLGALT2
0	grey	DUOX2
0	grey	TMEM176A
10	purple	COCH
16	lightcyan	NFE4
0	grey	KBTBD8
12	tan	VWDE
0	grey	TP53TG3
1	turquoise	NKAIN4
10	purple	GTSE1
4	blue	P2RY13
0	grey	ZG16B
7	black	CACNA2D2
11	greenyellow	MAPT-AS1
1	turquoise	ODAM
0	grey	BRIP1
9	lightgreen	GPT
4	blue	DPEP2
0	grey	WASIR2
6	red	EFHD1
0	grey	LINC00919
4	blue	ICOS
0	grey	MS4A1
0	grey	LOC284412
15	midnightblue	HDAC9
0	grey	TUNAR
5	green	LMNTD1
10	purple	HJURP
3	brown	NPPC
0	grey	MS4A5
5	green	MINOS1P1
0	grey	VWC2L
0	grey	TBC1D22A-AS1
5	green	NANOG
0	grey	SLC5A9
3	brown	MXRA5
0	grey	LOC100130256
1	turquoise	ANKRD30BL
0	grey	NTM-AS1
0	grey	ANKRD31
6	red	PYGO1
8	pink	FAM78A
0	grey	PLEKHA4
9	lightgreen	SLC22A18AS
0	grey	ST8SIA5
0	grey	OR4F4
12	tan	RTKN2
16	lightcyan	FCN2
0	grey	KCNJ16
4	blue	HCK
0	grey	SCN7A
1	turquoise	PPP1R2P2
2	blue	CXCL5
2	blue	PDE1B
0	grey	GSTM3
20	pink	HLA-DRB1
0	grey	HMGCLL1
0	grey	NR1I2
10	purple	MELK
0	grey	PPP4R1L
0	grey	CA9
0	grey	IGSF21
0	grey	LINC01558
12	tan	HYAL1
17	grey60	GOLGA6C
0	grey	THNSL2
0	grey	OR1D5
14	cyan	FLNA
11	greenyellow	DEFB104B
0	grey	KLK10
1	turquoise	RIMS3
0	grey	LOC650226
3	brown	TPRG1
0	grey	SERPINA9
1	turquoise	CREG2
0	grey	LINC00944
0	grey	TENM2
0	grey	LRTM1
9	lightgreen	VCY
4	blue	LCP2
10	purple	IL13RA2
0	grey	CRX
9	lightgreen	NKX1-2
14	cyan	PODXL2
15	midnightblue	PLA2G4A
0	grey	DCDC1
13	green	SGK2
9	lightgreen	KCNK12
2	blue	ICAM2
1	turquoise	ATP2A1
4	blue	FCHO1
2	blue	PTPRO
1	turquoise	SORCS1
0	grey	IL17F
0	grey	KRT79
0	grey	ANO1
3	brown	CH25H
0	grey	UGT2B15
0	grey	LOC105371374
13	green	HSD17B3
0	grey	IGSF1
1	turquoise	MAGEA12
0	grey	ULK4P1
0	grey	PGM5-AS1
0	grey	AZGP1
2	blue	PLXND1
5	green	INE1
1	turquoise	MUC7
0	grey	ABCC11
22	darkgreen	HDC
0	grey	LINC01549
14	cyan	REXO1
13	green	SPAG8
3	brown	CYYR1
0	grey	RFPL1
1	turquoise	ART1
0	grey	SNHG5
8	pink	SIT1
0	grey	PLSCR2
0	grey	RGS9BP
0	grey	PRSS35
8	pink	IL21R
0	grey	BFSP2
4	blue	CYTH4
0	grey	KCNA10
12	tan	MATN1
0	grey	INSRR
1	turquoise	RBMY2FP
3	brown	S1PR5
4	blue	HLA-DRA
0	grey	C6orf223
7	black	SLAMF9
13	green	STRC
0	grey	CERCAM
15	midnightblue	VSIG1
0	grey	PROC
0	grey	PHOX2B
2	blue	DPYSL2
1	turquoise	OR56B1
0	grey	HOXD10
0	grey	OR2A9P
0	grey	BSN
2	blue	TIMP2
0	grey	SLC9A2
0	grey	SRMS
0	grey	NLRP4
4	blue	APOBR
16	lightcyan	IGLL1
0	grey	SEMA3G
0	grey	ERBB4
0	grey	LINC00158
6	red	PIEZO2
20	pink	CHST2
0	grey	NLGN1
0	grey	SVIL
3	brown	LHFP
0	grey	IGHA1
1	turquoise	PDE6G
0	grey	ASMT
3	brown	PCDHB11
21	darkred	GEM
0	grey	KCNS1
0	grey	ZNF663P
11	greenyellow	C1orf127
19	lightyellow	SPOCK1
0	grey	AMDHD1
14	cyan	SF3B4
3	brown	CAV1
1	turquoise	AOC2
8	pink	ARHGAP9
0	grey	IGK///IGKV3-20///IGHV3-23
0	grey	TP53TG3HP
0	grey	OR2A25
0	grey	INGX
11	greenyellow	LOC100128079
0	grey	DYNC1I1
0	grey	SLC6A7
2	blue	FUOM
0	grey	GAGE7
0	grey	PGBD3///ERCC6
6	red	NACAD
2	blue	P2RX7
13	green	C16orf89
13	green	C12orf74
4	blue	BCL2A1
1	turquoise	LINC01350
0	grey	CATSPERG
7	black	MCOLN2
0	grey	CYP3A7
10	purple	LHX2
1	turquoise	GP5
2	blue	GPNMB
18	lightgreen	MAFG-AS1
8	pink	GIMAP1
0	grey	TREH
10	purple	ANKRD22
0	grey	SYCE3
0	grey	LOC105370424
0	grey	KCNN4
0	grey	SNHG17
0	grey	ART4
0	grey	RHBDL3
12	tan	GSN
19	lightyellow	DPYSL5
12	tan	VSIG2
1	turquoise	CELF3
0	grey	PLEKHG1
0	grey	OR4C3
0	grey	GLYATL1
11	greenyellow	GGNBP1
1	turquoise	LRRC2
0	grey	RAMP3
21	darkred	NR4A3
5	green	LINC00939
0	grey	KRTAP9-9
0	grey	CLEC3B
0	grey	PDZD3
0	grey	LOC441666
1	turquoise	POU2F3
22	darkgreen	KIT
0	grey	NFE2L3
0	grey	LOC100132099
0	grey	DKKL1
0	grey	MMD2
0	grey	C11orf44
0	grey	LINC00907
0	grey	PABPC4L
5	green	ADAM20P1
5	green	GOLGA2P2Y
2	blue	SIRPD
1	turquoise	OR4C46
0	grey	TRGV7
0	grey	LINC01249
3	brown	DAPL1
0	grey	SLAMF6
0	grey	LOC400756
14	cyan	BPIFB1
14	cyan	LSP1
7	black	MT1M
0	grey	GPR50
0	grey	APBB1
5	green	LOC101926935
22	darkgreen	GRAP2
2	blue	ARHGAP10
0	grey	ADCYAP1
1	turquoise	HBBP1
8	pink	A2M
14	cyan	FASN
4	blue	HLA-DMB
0	grey	BMP6
0	grey	BTBD16
0	grey	PAMR1
2	blue	CHRNA3
0	grey	FAM198A
14	cyan	ALPL
9	lightgreen	PAEP
8	pink	DOCK10
1	turquoise	ZFP30
10	purple	HIST1H4A
1	turquoise	GRASP
19	lightyellow	BEAN1
0	grey	CETP
0	grey	RNF175
0	grey	APLNR
7	black	ETV5
0	grey	LINC00475
11	greenyellow	MYO3A
0	grey	C9orf66
1	turquoise	SMIM24
0	grey	TRIM55
0	grey	GDF15
19	lightyellow	NRXN1
0	grey	ORC1
15	midnightblue	ASRGL1
0	grey	LINC01497
8	pink	ITGA4
2	blue	FILIP1L
0	grey	VIT
11	greenyellow	MAGEA6
1	turquoise	SOX15
17	grey60	ACTG1P4
0	grey	TMEM119
1	turquoise	ARL17B
22	darkgreen	CNRIP1
8	pink	CD3G
4	blue	CYTIP
0	grey	SSMEM1
21	darkred	JUNB
0	grey	RAB3B
0	grey	HTR3B
0	grey	HAPLN3
1	turquoise	PCDHB6
0	grey	ADRA1B
0	grey	SLC6A20
2	blue	FAM225A
8	pink	CD3D
21	darkred	SOCS3
10	purple	KIF4A
9	lightgreen	PCDHB14
0	grey	GPX2
0	grey	FMO2
0	grey	HIGD1B
0	grey	CLEC14A
0	grey	VAV2
0	grey	CT55
4	blue	TNFAIP8L2
13	green	POTEC
11	greenyellow	LOC100507412///RNA5-8S5
5	green	SERPINI2
6	red	AQP4
4	blue	ZEB2
10	purple	TACC3
15	midnightblue	LRRC17
1	turquoise	MARS2
8	pink	TIGIT
0	grey	GRIP1
0	grey	MAJIN
0	grey	LOC644450
19	lightyellow	CADM2
0	grey	CYP2A7
0	grey	DIAPH2-AS1
1	turquoise	PDZK1
10	purple	NETO2
11	greenyellow	SLURP1
1	turquoise	PCDHGB1
13	green	GABRE
0	grey	LINC01013
0	grey	CRYBB2
20	pink	CCL25
0	grey	LINC00638
0	grey	TULP1
0	grey	NMNAT2
0	grey	KRTAP4-8
0	grey	C1QL1
9	lightgreen	GPR12
0	grey	RNF39
12	tan	FOXA3
0	grey	PP12613
0	grey	ZNF233
0	grey	LINC01619
1	turquoise	RBMXL2
6	red	MAOB
8	pink	TRAF3IP3
6	red	FBXO2
1	turquoise	PRRX1
13	green	POU2AF1
17	grey60	OR4D5
4	blue	HLA-DOA
0	grey	ISL1
0	grey	TRPC6
0	grey	LINC01101
0	grey	TMEM81
20	pink	HLA-DPB2
0	grey	ZP4
0	grey	CA3
0	grey	CROCCP2
0	grey	RAET1E-AS1
14	cyan	CD74
0	grey	CALCR
0	grey	VN1R5
0	grey	MAP3K7CL
0	grey	PRG2
0	grey	ADGRF5
1	turquoise	KRT36
8	pink	PYHIN1
5	green	SLC9C2
2	blue	SLC47A1
13	green	CELF6
1	turquoise	KLHL40
5	green	PRSS38
0	grey	IFNA5
0	grey	DOK6
0	grey	TMTC1
3	brown	NTF3
10	purple	ZBED2
0	grey	MATN2
0	grey	CRLF1
0	grey	H1FOO
0	grey	HS3ST2
0	grey	MIAT
0	grey	BTNL9
0	grey	LIPI
1	turquoise	OLIG3
0	grey	VWCE
18	lightgreen	BHLHE23
3	brown	FGF9
0	grey	KLRF1
6	red	AMY1C
8	pink	FAM26F
1	turquoise	NR2E1
0	grey	CLUL1
0	grey	MAL
0	grey	CRYGN
9	lightgreen	CHST13
0	grey	AVPR2
15	midnightblue	EPHX4
0	grey	MYL9
0	grey	GYG2
11	greenyellow	GPR78
5	green	LOC100132593
0	grey	SLC35F1
0	grey	LIPC
0	grey	CYP2C8
0	grey	TMPRSS11A
0	grey	C5orf66
0	grey	NOX4
0	grey	HOXC5
0	grey	RADIL
0	grey	GPR82
1	turquoise	REG1B
17	grey60	PIP5K1P1
5	green	ILDR1
4	blue	BIN2
0	grey	MEGF11
0	grey	ACOT12
0	grey	P2RY6
1	turquoise	CTAG1A
0	grey	SNAP91
0	grey	FAM101A
9	lightgreen	RPGRIP1
4	blue	LILRA3
0	grey	ELOVL3
13	green	LOC105376790
0	grey	CCKBR
0	grey	C2orf54
0	grey	BCO1
8	pink	NAPSB
0	grey	GCNT3
0	grey	ZNF365
1	turquoise	ACTRT2
0	grey	LOC101927211
2	blue	SLC24A4
0	grey	TSPAN33
0	grey	KLK13
0	grey	UGT2B11
0	grey	ACY3
12	tan	SLC39A8
11	greenyellow	ANGPT4
3	brown	AEBP1
0	grey	LOC101927038
1	turquoise	MIR133A1
13	green	LINC00506
5	green	DOC2A
0	grey	ANO3
1	turquoise	PLPP4
0	grey	MUCL1
6	red	KCNB1
0	grey	AHNAK2
[truncated: 3,001 more rows]
