# Supplementary material for: Key genes and co-expression modules involved in asthma pathogenesis
Source: PeerJ. 2020 Feb 3;8:e8456. doi: 10.7717/peerj.8456 (PMC7003696; doi:10.7717/peerj.8456)
Supplement: Supplemental Information 6 [file peerj-08-8456-s006.xlsx]

## Sheet: 37 stable genes
Module	Gene
blue	HLA-DPB1
brown	IL20RB
darkgreen	SLC18A2
darkred	GEM
darkred	NCOA7
green	MICAL3
green	NANOG
grey	ABCA13
grey	HSD17B13
grey	KCNN4
grey	KRT73
grey	NPAP1
grey	PCDHB9
grey	SMA5
grey	SPP1
grey	TPO
grey	CEMIP
lightcyan	DEFA3
lightyellow	SYT4
pink	LGALS2
pink	QPRT
pink	LINC00892
red	PER2
red	SEMA3E
red	SLCO1B3
red	WNK4
red	SYT13
tan	COPZ2
tan	KCNK6
tan	SOD2
black	CPXM1
black	NAT8B
black	SLAMF7
black	TLL1
midnightblue	COMTD1
midnightblue	DNAJC1
midnightblue	SLC9B1

## Sheet: Repeated Random Forest Analysis
set.seed(69)	set.seed(70)	set.seed(71)
ABCA13	ABCA13	ABCA13
ARMC12	ALOX15B	ARL4D
BMP7	ARL4D	ASAP1-IT2
C1orf186	BOK	C16orf89
CEMIP	CEMIP	C1orf186
COMTD1	COMTD1	CEMIP
COPZ2	COPZ2	COMTD1
CPXM1	CPXM1	COPZ2
DEFA3	DEFA3	CPXM1
DNAJC1	DNAJC1	CRABP2
FKBP5	DNASE1L3	DEFA3
GEM	GEM	DNAJC1
HLA-DPB1	HLA-DPB1	FAM83D
HSD17B13	HSD11B2	FKBP5
IGHA2///IGHA1///IGH	HSD17B13	GEM
IL20RB	IFI44	GPR156
KCNK6	IGHA2///IGHA1///IGH	GUCY2F
KCNN4	IL20RB	HLA-DPB1
KRT73	KCNK6	HS3ST2
LGALS2	KCNN4	HSD17B13
LINC00892	KRT73	IFI44
LOC100130193	LGALS2	IL20RB
LOC100294362	LINC00892	KCNK6
MEF2C	MICAL3	KCNN4
MICAL3	NANOG	KRT73
NANOG	NAT8B	LGALS2
NAT8B	NCOA7	LINC00892
NCOA7	NPAP1	MDFI
NPAP1	PCDHB9	MEF2C
OCA2	PER2	MICAL3
PCDHB9	PRKCG	NANOG
PER2	PRSS50	NAT8B
PRKCG	QPRT	NCOA7
PRSS50	RNF182	NPAP1
QPRT	SEMA3E	PCDHB9
RNF182	SIGLEC8	PER2
SEMA3E	SLAMF7	QPRT
SLAMF7	SLC18A2	SEMA3E
SLC18A2	SLC9B1	SLAMF7
SLC9B1	SLCO1B3	SLC18A2
SLCO1B3	SMA5	SLC9B1
SMA5	SOD2	SLCO1B3
SOD2	SPP1	SMA5
SPP1	SPTY2D1-AS1	SOD2
SYT13	SYT13	SPP1
SYT4	SYT4	SYT13
TGM7	TGM7	SYT4
TLL1	TLL1	TLL1
TPO	TPO	TPO
WNK4	WNK4	WNK4
