# Supplementary material for: Key genes and co-expression modules involved in asthma pathogenesis
Source: PeerJ. 2020 Feb 3;8:e8456. doi: 10.7717/peerj.8456 (PMC7003696; doi:10.7717/peerj.8456)
Supplement: Supplemental Information 7 [file peerj-08-8456-s007.xlsx]

## Sheet: Sheet1
	HLA-DPB1	IL20RB	SLC18A2	GEM	NCOA7	MICAL3	NANOG	ABCA13	HSD17B13	KCNN4	KRT73	NPAP1	PCDHB9	SMA5	SPP1	TPO	CEMIP	DEFA3	SYT4	LGALS2	QPRT	LINC00892	PER2	SEMA3E	SLCO1B3	WNK4	SYT13	COPZ2	KCNK6	SOD2	CPXM1	NAT8B	SLAMF7	TLL1	COMTD1	DNAJC1	SLC9B1
HLA-DPB1	1	0.234648	0.105713	0.295327	0.334578	0.244721	0.0692901	0.196586	0.0694606	0.00616714	0.155791	0.0612424	0.353435	0.0497177	0.0351342	0.345332	0.20352	0.0015413	0.127565	0.503599	0.563766	0.579187	0.0420605	0.117837	0.379032	0.175033	0.0231022	0.220924	0.00655228	0.206215	0.303897	0.329481	0.397758	0.239674	0.121838	0.155505	0.0461542
IL20RB	0.234648	1	0.288682	0.0501677	0.0670801	0.0966335	0.0271892	0.0793202	0.244986	0.377608	0.425634	0.179844	0.285468	0.0468679	0.000524685	0.288714	0.309804	0.149738	0.138274	0.2533	0.333561	0.271952	0.00775525	0.228448	0.377338	0.308175	0.176985	0.35279	0.0170592	0.229511	0.197153	0.27863	0.0319739	0.173988	0.101536	0.166082	0.0528282
SLC18A2	0.105713	0.288682	1	0.216776	0.330065	0.264149	0.225148	0.194647	0.378086	0.343972	0.12134	0.0602526	0.0812742	0.321146	0.146574	0.0543836	0.182149	0.0256374	0.160729	0.186724	0.0771864	0.428795	0.301588	0.00651473	0.134412	0.0028788	0.104988	0.177143	0.453441	0.385389	0.164055	0.238401	0.378988	0.279631	0.363704	0.308072	0.0856581
GEM	0.295327	0.0501677	0.216776	1	0.745512	0.00105414	0.0126307	0.311614	0.0470084	0.137552	0.221847	0.074549	0.26834	0.127527	0.119409	0.428775	0.277786	0.252767	0.528553	0.296454	0.199359	0.0108192	0.502923	0.51171	0.427027	0.453678	0.460339	0.306887	0.514082	0.0375203	0.463203	0.513508	0.566746	0.449098	0.629849	0.607778	0.347546
NCOA7	0.334578	0.0670801	0.330065	0.745512	1	0.0185321	0.0717428	0.472537	0.0448246	0.0489556	0.194855	0.20165	0.27049	0.0403583	0.0205887	0.436747	0.203889	0.123006	0.319608	0.422718	0.268804	0.0595149	0.521455	0.326304	0.318274	0.346311	0.29082	0.393401	0.517883	0.334267	0.399482	0.402169	0.585637	0.341021	0.571342	0.546025	0.28688
MICAL3	0.244721	0.0966335	0.264149	0.00105414	0.0185321	1	0.591207	0.356215	0.0461556	0.128071	0.213608	0.0602348	0.053485	0.484552	0.0993389	0.157598	0.141345	0.0838269	0.10026	0.143567	0.377685	0.502347	0.434289	0.221542	0.0444665	0.340417	0.273821	0.459144	0.450731	0.190438	0.0359784	0.174009	0.10392	0.231566	0.412931	0.488059	0.177079
NANOG	0.0692901	0.0271892	0.225148	0.0126307	0.0717428	0.591207	1	0.58311	0.151485	0.0500506	0.0809343	0.00677668	0.120071	0.299078	0.0643338	0.190652	0.0662381	0.0761496	0.0911113	0.0333089	0.212088	0.235898	0.316815	0.0573474	0.0211988	0.0580103	0.0311317	0.214794	0.262977	0.405443	0.213915	0.131692	0.110753	0.126714	0.0796419	0.186002	0.0377782
ABCA13	0.196586	0.0793202	0.194647	0.311614	0.472537	0.356215	0.58311	1	0.0123935	0.0826941	0.240932	0.0592141	0.133927	0.21628	0.209394	0.329612	0.225988	0.00553892	0.150195	0.39366	0.0533542	0.00260387	0.460216	0.237324	0.29655	0.320036	0.128088	0.409509	0.418033	0.355877	0.160624	0.183924	0.329147	0.291697	0.390903	0.37749	0.203528
HSD17B13	0.0694606	0.244986	0.378086	0.0470084	0.0448246	0.0461556	0.151485	0.0123935	1	0.467804	0.164506	0.190627	0.160668	0.0991696	0.12818	0.0608537	0.190443	0.186727	0.0995926	0.0909902	0.0804108	0.0814817	0.0251466	0.269321	0.29716	0.34153	0.37174	0.0900401	0.0508708	0.347198	0.167967	0.10606	0.0542649	0.134784	0.0785182	0.15313	0.0140744
KCNN4	0.00616714	0.377608	0.343972	0.137552	0.0489556	0.128071	0.0500506	0.0826941	0.467804	1	0.275218	0.104656	0.235126	0.0855409	0.227428	0.292223	0.370373	0.304376	0.190405	0.157908	0.052578	0.176778	0.0550258	0.421686	0.373858	0.456152	0.399109	0.11919	0.0608753	0.335247	0.266157	0.266762	0.0129523	0.221968	0.0124346	0.10491	0.045279
KRT73	0.155791	0.425634	0.12134	0.221847	0.194855	0.213608	0.0809343	0.240932	0.164506	0.275218	1	0.011429	0.284406	0.149679	0.102712	0.202995	0.238145	0.191537	0.189852	0.264788	0.118242	0.145367	0.117506	0.355134	0.267486	0.315096	0.208993	0.359229	0.148267	0.0257172	0.201523	0.297647	0.222492	0.145849	0.276102	0.302824	0.194331
NPAP1	0.0612424	0.179844	0.0602526	0.074549	0.20165	0.0602348	0.00677668	0.0592141	0.190627	0.104656	0.011429	1	0.0543933	0.0994449	0.0245699	0.0733714	0.193291	0.0771737	0.0985413	0.0455501	0.050434	0.042231	0.204559	0.156428	0.0704827	0.230071	0.28411	0.128999	0.307693	0.120103	0.114809	0.00726836	0.0421457	0.0938721	0.156626	0.255875	0.269006
PCDHB9	0.353435	0.285468	0.0812742	0.26834	0.27049	0.053485	0.120071	0.133927	0.160668	0.235126	0.284406	0.0543933	1	0.0191088	0.166189	0.185323	0.187584	0.332795	0.173365	0.305697	0.180602	0.259718	0.0563584	0.25839	0.233465	0.243631	0.204573	0.223785	0.0231901	0.17766	0.377538	0.381819	0.0909158	0.0641576	0.221146	0.108988	0.0306517
SMA5	0.0497177	0.0468679	0.321146	0.127527	0.0403583	0.484552	0.299078	0.21628	0.0991696	0.0855409	0.149679	0.0994449	0.0191088	1	0.132178	0.104792	0.103153	0.0968187	0.0331062	0.0239781	0.00454644	0.27561	0.111739	0.0638456	0.0515063	0.0670313	0.0213801	0.382383	0.105246	0.273796	0.00140098	0.13059	0.143686	0.125145	0.175984	0.232219	0.11401
SPP1	0.0351342	0.000524685	0.146574	0.119409	0.0205887	0.0993389	0.0643338	0.209394	0.12818	0.227428	0.102712	0.0245699	0.166189	0.132178	1	0.0334872	0.104077	0.200496	0.0246472	0.150417	0.0906079	0.0875096	0.0436053	0.1209	0.0094529	0.0189644	0.0349353	0.221508	0.129672	0.302782	0.0176638	0.0939804	0.0285024	0.0427808	0.079224	0.0794848	0.183813
TPO	0.345332	0.288714	0.0543836	0.428775	0.436747	0.157598	0.190652	0.329612	0.0608537	0.292223	0.202995	0.0733714	0.185323	0.104792	0.0334872	1	0.375004	0.066918	0.203587	0.362974	0.406924	0.141643	0.312991	0.358741	0.628298	0.471378	0.326076	0.460023	0.411192	0.295699	0.374555	0.421331	0.48041	0.474764	0.413512	0.494067	0.277032
CEMIP	0.20352	0.309804	0.182149	0.277786	0.203889	0.141345	0.0662381	0.225988	0.190443	0.370373	0.238145	0.193291	0.187584	0.103153	0.104077	0.375004	1	0.0699022	0.106756	0.14622	0.255313	0.121092	0.232648	0.34051	0.270558	0.439569	0.26392	0.342484	0.359151	0.0386554	0.217176	0.221422	0.100311	0.294093	0.286132	0.340516	0.12573
DEFA3	0.0015413	0.149738	0.0256374	0.252767	0.123006	0.0838269	0.0761496	0.00553892	0.186727	0.304376	0.191537	0.0771737	0.332795	0.0968187	0.200496	0.066918	0.0699022	1	0.417803	0.103675	0.0308902	0.0335641	0.264095	0.379384	0.101546	0.307889	0.360517	0.0344398	0.125533	0.300326	0.24059	0.137647	0.0415027	0.0903099	0.190909	0.11412	0.181959
SYT4	0.127565	0.138274	0.160729	0.528553	0.319608	0.10026	0.0911113	0.150195	0.0995926	0.190405	0.189852	0.0985413	0.173365	0.0331062	0.0246472	0.203587	0.106756	0.417803	1	0.129489	0.14116	0.103941	0.45161	0.550858	0.413545	0.52597	0.584356	0.24033	0.312991	0.157517	0.472376	0.43568	0.375136	0.504016	0.445888	0.395625	0.410417
LGALS2	0.503599	0.2533	0.186724	0.296454	0.422718	0.143567	0.0333089	0.39366	0.0909902	0.157908	0.264788	0.0455501	0.305697	0.0239781	0.150417	0.362974	0.14622	0.103675	0.129489	1	0.406011	0.444225	0.112757	0.257329	0.477932	0.286737	0.175529	0.215828	0.0242529	0.0494545	0.322481	0.284515	0.415892	0.0620465	0.0887607	0.14679	0.0319098
QPRT	0.563766	0.333561	0.0771864	0.199359	0.268804	0.377685	0.212088	0.0533542	0.0804108	0.052578	0.118242	0.050434	0.180602	0.00454644	0.0906079	0.406924	0.255313	0.0308902	0.14116	0.406011	1	0.481245	0.0238364	0.0699693	0.427201	0.238307	0.155481	0.180574	0.0816587	0.0831345	0.398929	0.347903	0.306343	0.274147	0.0908313	0.161221	0.0834677
LINC00892	0.579187	0.271952	0.428795	0.0108192	0.0595149	0.502347	0.235898	0.00260387	0.0814817	0.176778	0.145367	0.042231	0.259718	0.27561	0.0875096	0.141643	0.121092	0.0335641	0.103941	0.444225	0.481245	1	0.30482	0.00658735	0.173918	0.00359915	0.136301	0.00248679	0.255324	0.0729342	0.122769	0.00688975	0.0905943	0.0985397	0.193574	0.19027	0.0423608
PER2	0.0420605	0.00775525	0.301588	0.502923	0.521455	0.434289	0.316815	0.460216	0.0251466	0.0550258	0.117506	0.204559	0.0563584	0.111739	0.0436053	0.312991	0.232648	0.264095	0.45161	0.112757	0.0238364	0.30482	1	0.38174	0.345806	0.555085	0.529561	0.436405	0.65281	0.291635	0.30522	0.371754	0.438467	0.431188	0.634086	0.648188	0.373634
SEMA3E	0.117837	0.228448	0.00651473	0.51171	0.326304	0.221542	0.0573474	0.237324	0.269321	0.421686	0.355134	0.156428	0.25839	0.0638456	0.1209	0.358741	0.34051	0.379384	0.550858	0.257329	0.0699693	0.00658735	0.38174	1	0.423421	0.633746	0.583196	0.399815	0.432303	0.0726112	0.377781	0.402062	0.403056	0.445947	0.468743	0.459317	0.451073
SLCO1B3	0.379032	0.377338	0.134412	0.427027	0.318274	0.0444665	0.0211988	0.29655	0.29716	0.373858	0.267486	0.0704827	0.233465	0.0515063	0.0094529	0.628298	0.270558	0.101546	0.413545	0.477932	0.427201	0.173918	0.345806	0.423421	1	0.648928	0.484571	0.375987	0.278349	0.00940367	0.520153	0.504882	0.464616	0.427039	0.348563	0.452769	0.182116
WNK4	0.175033	0.308175	0.0028788	0.453678	0.346311	0.340417	0.0580103	0.320036	0.34153	0.456152	0.315096	0.230071	0.243631	0.0670313	0.0189644	0.471378	0.439569	0.307889	0.52597	0.286737	0.238307	0.00359915	0.555085	0.633746	0.648928	1	0.724573	0.455459	0.523948	0.0583698	0.484058	0.573929	0.370271	0.56293	0.45622	0.598129	0.377077
SYT13	0.0231022	0.176985	0.104988	0.460339	0.29082	0.273821	0.0311317	0.128088	0.37174	0.399109	0.208993	0.28411	0.204573	0.0213801	0.0349353	0.326076	0.26392	0.360517	0.584356	0.175529	0.155481	0.136301	0.529561	0.583196	0.484571	0.724573	1	0.22428	0.523167	0.0711003	0.514613	0.535184	0.325902	0.497531	0.482977	0.520823	0.478466
COPZ2	0.220924	0.35279	0.177143	0.306887	0.393401	0.459144	0.214794	0.409509	0.0900401	0.11919	0.359229	0.128999	0.223785	0.382383	0.221508	0.460023	0.342484	0.0344398	0.24033	0.215828	0.180574	0.00248679	0.436405	0.399815	0.375987	0.455459	0.22428	1	0.552978	0.268367	0.312487	0.472561	0.388354	0.398639	0.566739	0.578412	0.303213
KCNK6	0.00655228	0.0170592	0.453441	0.514082	0.517883	0.450731	0.262977	0.418033	0.0508708	0.0608753	0.148267	0.307693	0.0231901	0.105246	0.129672	0.411192	0.359151	0.125533	0.312991	0.0242529	0.0816587	0.255324	0.65281	0.432303	0.278349	0.523948	0.523167	0.552978	1	0.341688	0.295176	0.363029	0.394949	0.502421	0.715593	0.740179	0.534701
SOD2	0.206215	0.229511	0.385389	0.0375203	0.334267	0.190438	0.405443	0.355877	0.347198	0.335247	0.0257172	0.120103	0.17766	0.273796	0.302782	0.295699	0.0386554	0.300326	0.157517	0.0494545	0.0831345	0.0729342	0.291635	0.0726112	0.00940367	0.0583698	0.0711003	0.268367	0.341688	1	0.0208695	0.0460025	0.277742	0.189981	0.277452	0.280586	0.240747
CPXM1	0.303897	0.197153	0.164055	0.463203	0.399482	0.0359784	0.213915	0.160624	0.167967	0.266157	0.201523	0.114809	0.377538	0.00140098	0.0176638	0.374555	0.217176	0.24059	0.472376	0.322481	0.398929	0.122769	0.30522	0.377781	0.520153	0.484058	0.514613	0.312487	0.295176	0.0208695	1	0.778206	0.37395	0.475884	0.451098	0.432213	0.187338
NAT8B	0.329481	0.27863	0.238401	0.513508	0.402169	0.174009	0.131692	0.183924	0.10606	0.266762	0.297647	0.00726836	0.381819	0.13059	0.0939804	0.421331	0.221422	0.137647	0.43568	0.284515	0.347903	0.00688975	0.371754	0.402062	0.504882	0.573929	0.535184	0.472561	0.363029	0.0460025	0.778206	1	0.475348	0.559157	0.564427	0.601554	0.190476
SLAMF7	0.397758	0.0319739	0.378988	0.566746	0.585637	0.10392	0.110753	0.329147	0.0542649	0.0129523	0.222492	0.0421457	0.0909158	0.143686	0.0285024	0.48041	0.100311	0.0415027	0.375136	0.415892	0.306343	0.0905943	0.438467	0.403056	0.464616	0.370271	0.325902	0.388354	0.394949	0.277742	0.37395	0.475348	1	0.527503	0.496057	0.525875	0.216578
TLL1	0.239674	0.173988	0.279631	0.449098	0.341021	0.231566	0.126714	0.291697	0.134784	0.221968	0.145849	0.0938721	0.0641576	0.125145	0.0427808	0.474764	0.294093	0.0903099	0.504016	0.0620465	0.274147	0.0985397	0.431188	0.445947	0.427039	0.56293	0.497531	0.398639	0.502421	0.189981	0.475884	0.559157	0.527503	1	0.508906	0.545154	0.327359
COMTD1	0.121838	0.101536	0.363704	0.629849	0.571342	0.412931	0.0796419	0.390903	0.0785182	0.0124346	0.276102	0.156626	0.221146	0.175984	0.079224	0.413512	0.286132	0.190909	0.445888	0.0887607	0.0908313	0.193574	0.634086	0.468743	0.348563	0.45622	0.482977	0.566739	0.715593	0.277452	0.451098	0.564427	0.496057	0.508906	1	0.826257	0.490195
DNAJC1	0.155505	0.166082	0.308072	0.607778	0.546025	0.488059	0.186002	0.37749	0.15313	0.10491	0.302824	0.255875	0.108988	0.232219	0.0794848	0.494067	0.340516	0.11412	0.395625	0.14679	0.161221	0.19027	0.648188	0.459317	0.452769	0.598129	0.520823	0.578412	0.740179	0.280586	0.432213	0.601554	0.525875	0.545154	0.826257	1	0.473584
SLC9B1	0.0461542	0.0528282	0.0856581	0.347546	0.28688	0.177079	0.0377782	0.203528	0.0140744	0.045279	0.194331	0.269006	0.0306517	0.11401	0.183813	0.277032	0.12573	0.181959	0.410417	0.0319098	0.0834677	0.0423608	0.373634	0.451073	0.182116	0.377077	0.478466	0.303213	0.534701	0.240747	0.187338	0.190476	0.216578	0.327359	0.490195	0.473584	1
